# Supplementary material for: Syntheses and photophysical properties of 5′–6-locked fluorescent nucleosides
Source: Royal Society of Chemistry journal article supplement (doi:10.1039/c2ob26536b), 2012-11-01

## Synthesis and Photo-Physical Properties of 5'-6-Locked Fluorescent Nucleosides

Kristmann Gislason, Dnyaneshwar B. Gophane and Snorri Th. Sigurdsson\*

*Science Institute, University of Iceland, Dunhaga 3, 107 Reykjavik, Iceland*

### Table of Contents

|                                      |         |
|--------------------------------------|---------|
| Figure S1 .....                      | page S2 |
| Figure S2 .....                      | page S3 |
| CD-spectra.....                      | page S4 |
| HPLC-traces .....                    | page S5 |
| UV-Vis and fluorescence-spectra..... | page S6 |
| NMR-spectra .....                    | page S7 |

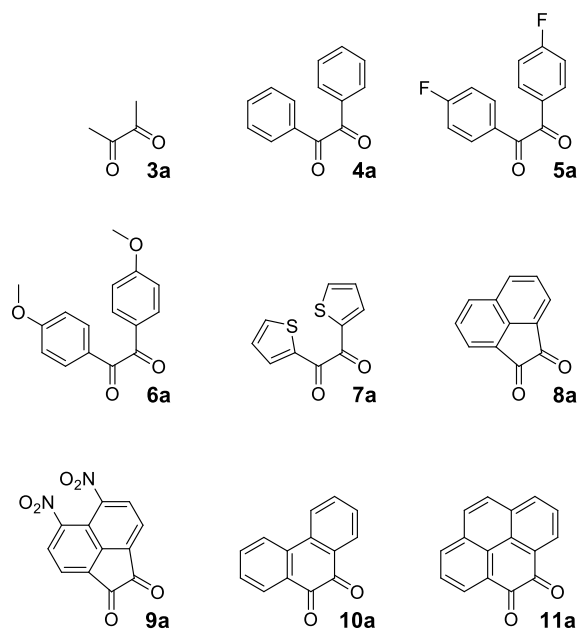

**Figure S1.** Structures of diketones **3a-11a**.

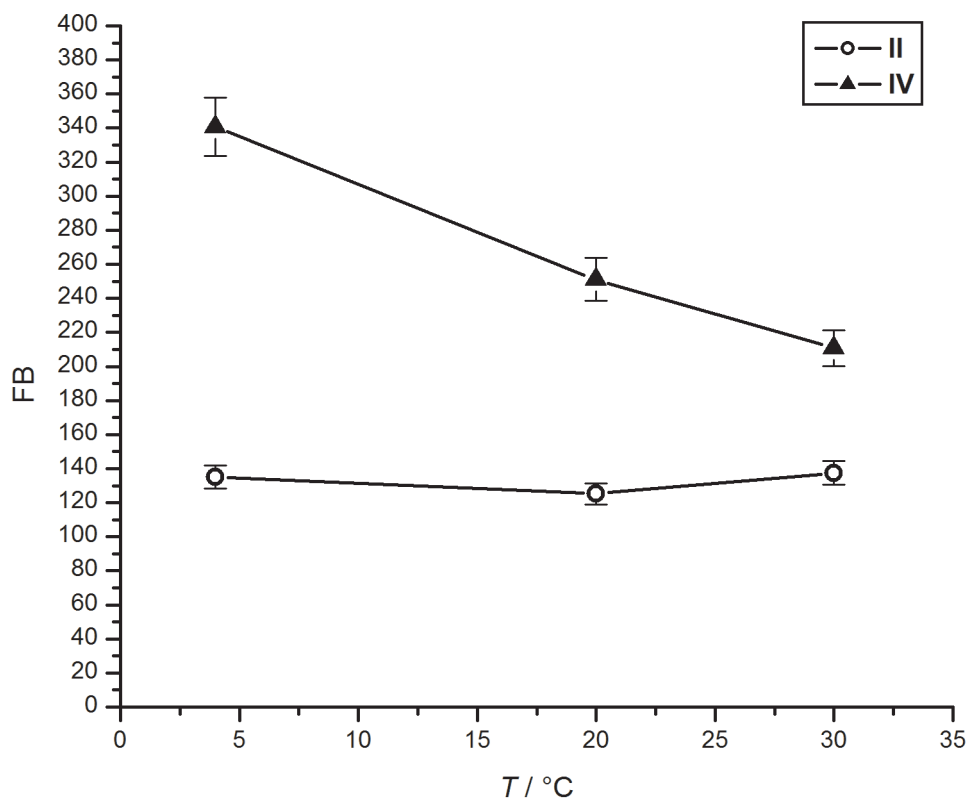

**Figure S2.** Temperature dependence of the fluorescence brightness of nucleoside **10** in **II** and **IV** in 30% ethylene glycol in aqueous buffer.

CD-spectra

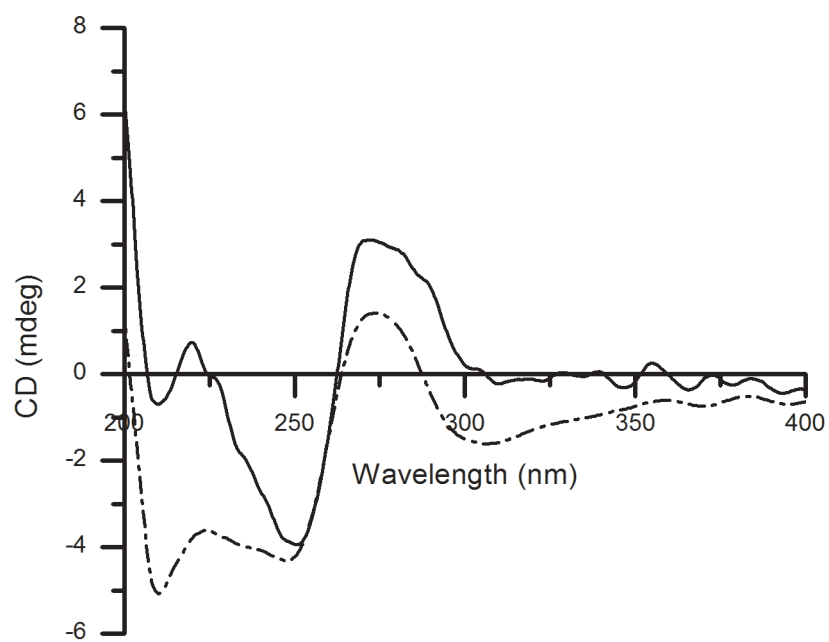

**Figure S3.** CD spectra of modified helix II (solid line) and the corresponding unmodified helix (dashed line).

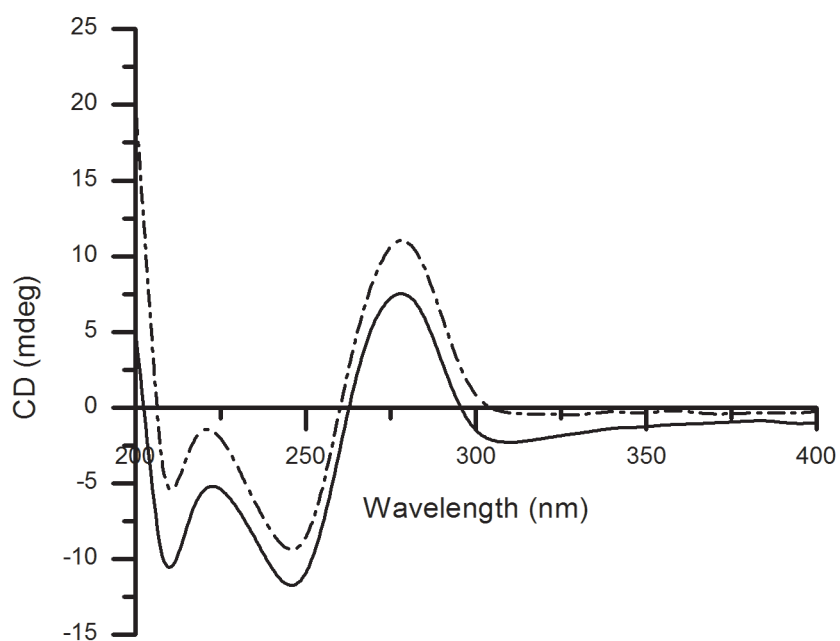

**Figure S4.** CD spectra of modified helix IV (solid line) and the corresponding unmodified helix (dashed line).

HPLC-traces

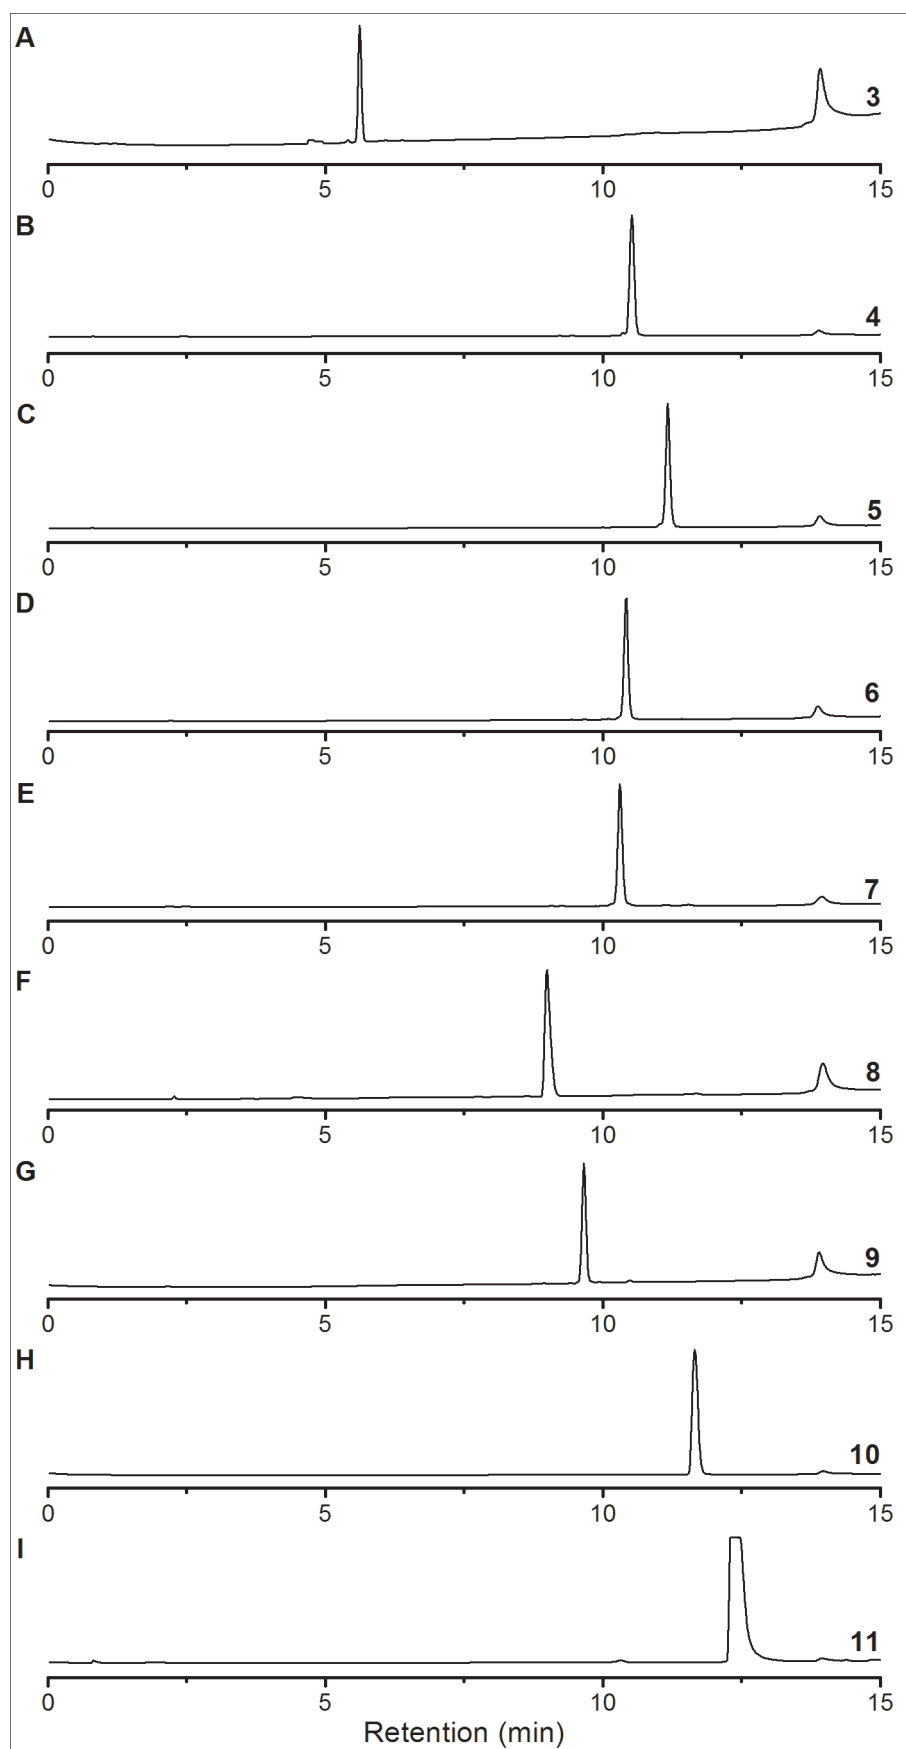

Figure S5. HPLC-traces for nucleosides 3-11. The small peak at around 14 minutes is an artifact also visible in blank runs.

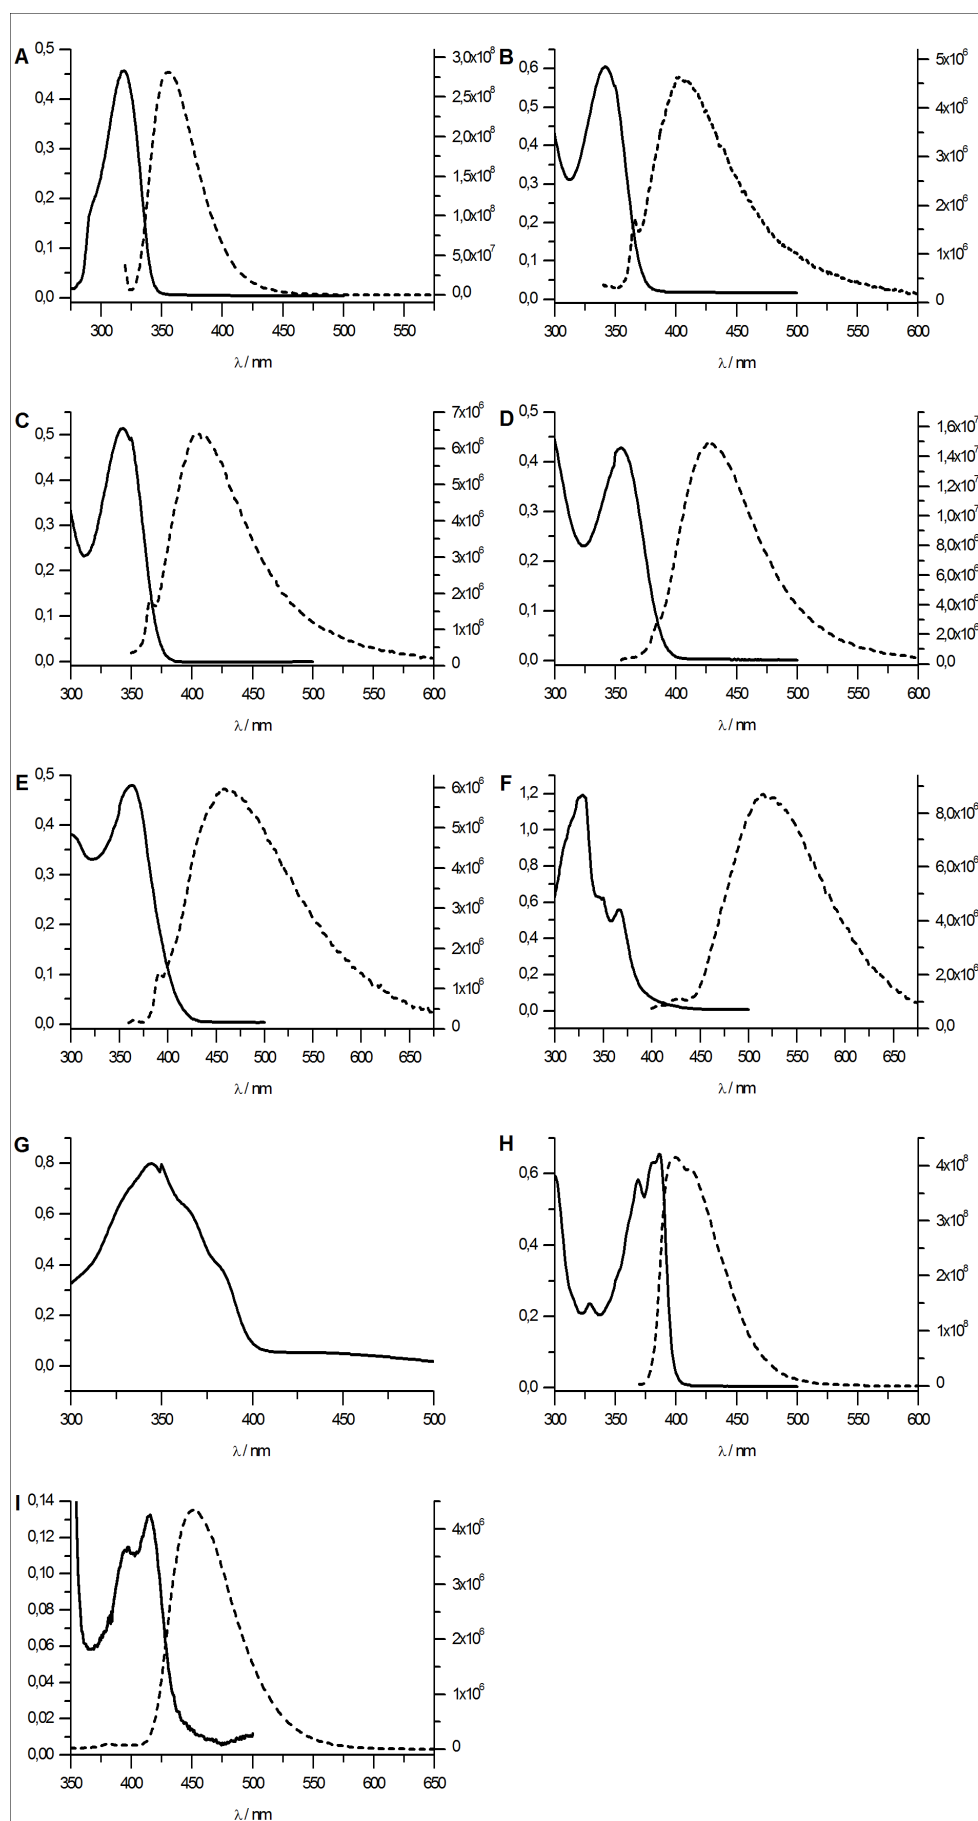

**Figure S6.** A-I) UV-Vis (solid lines) and fluorescence (broken lines) spectra for nucleosides **3-11** from Figure 3 in the main text, shown here with y-axes. Spectra recorded in THF. Left y-axis refers to absorption, right y-axis to emission.

NMR-spectra

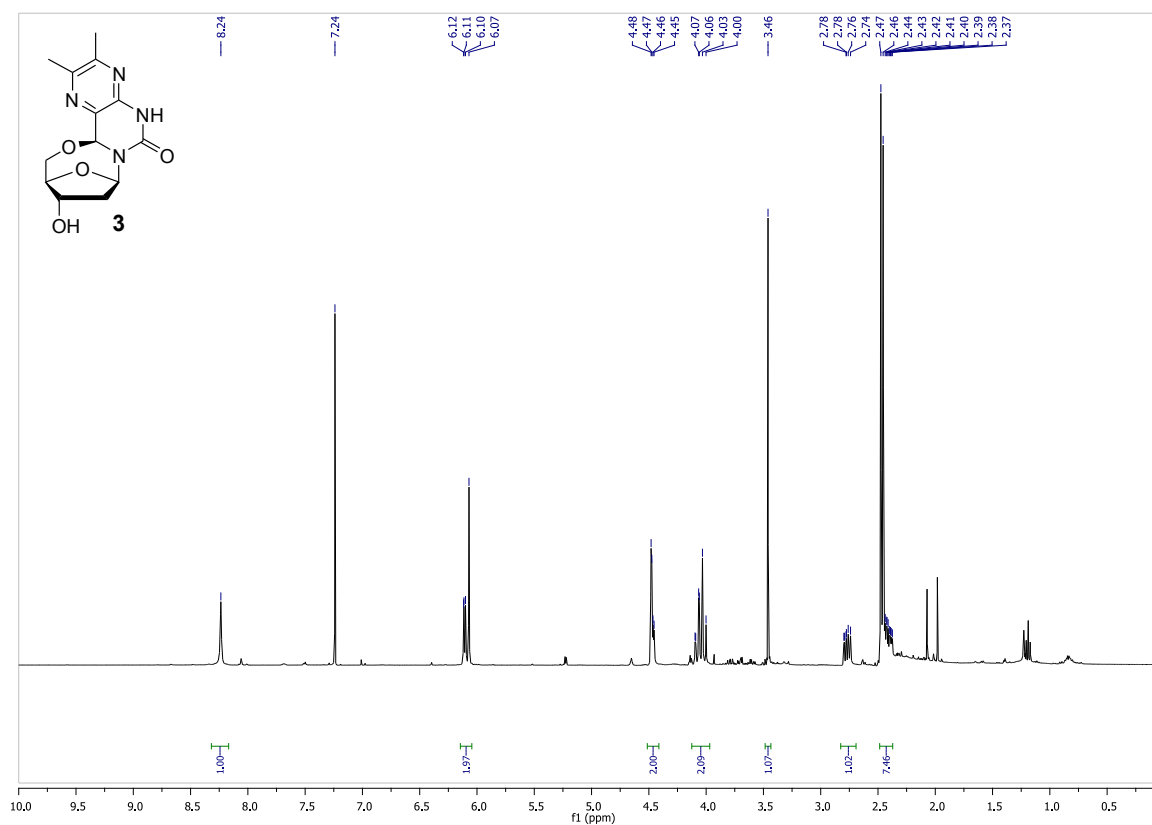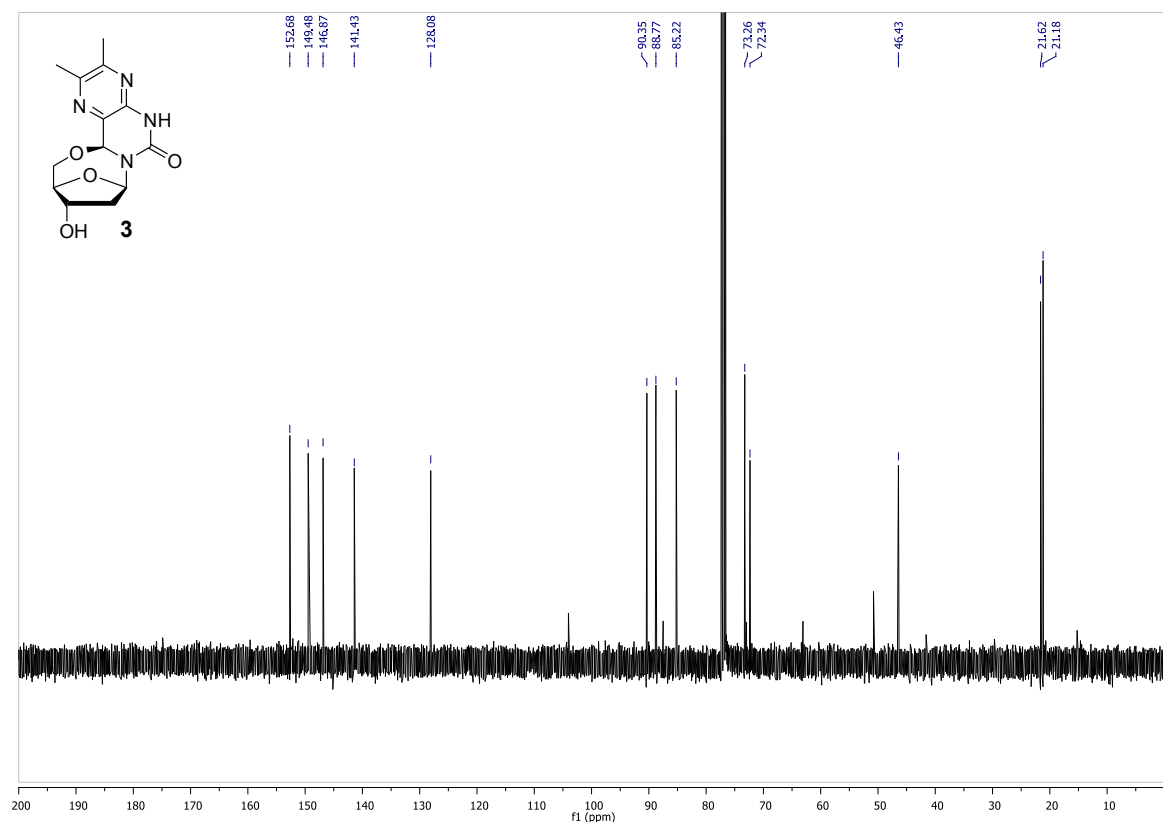

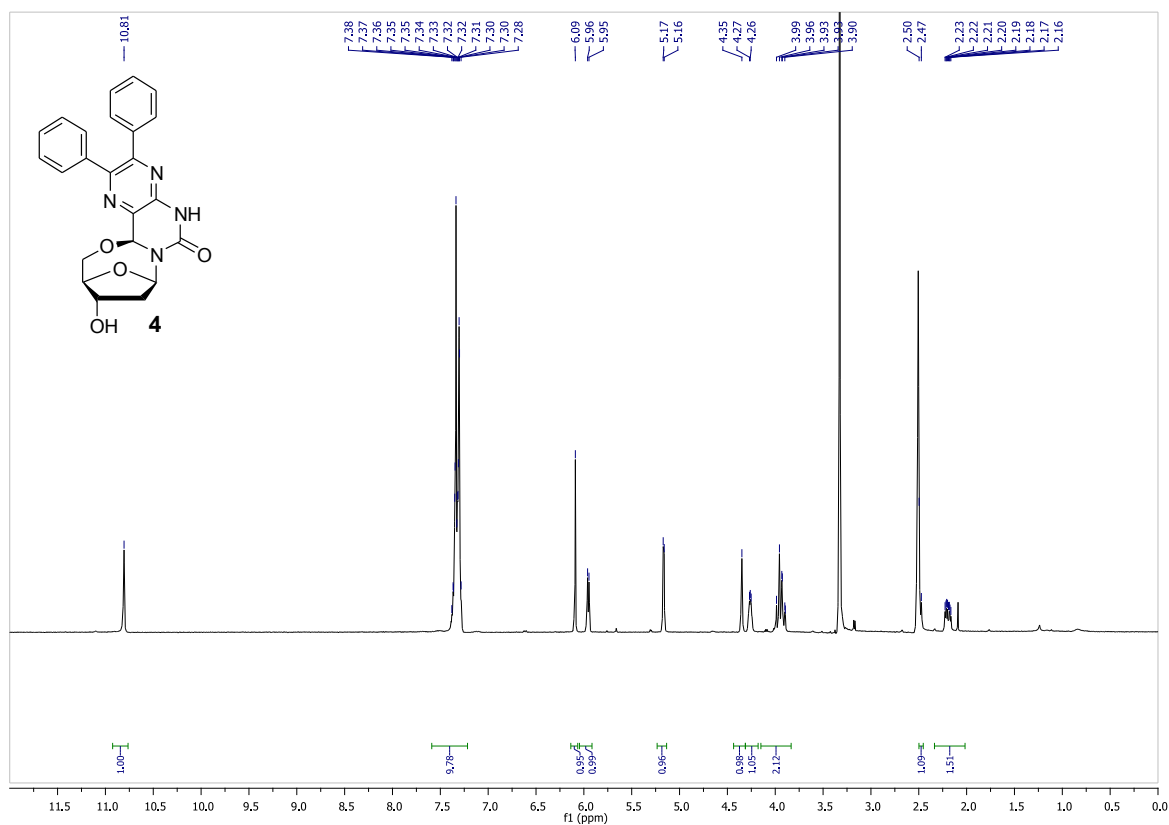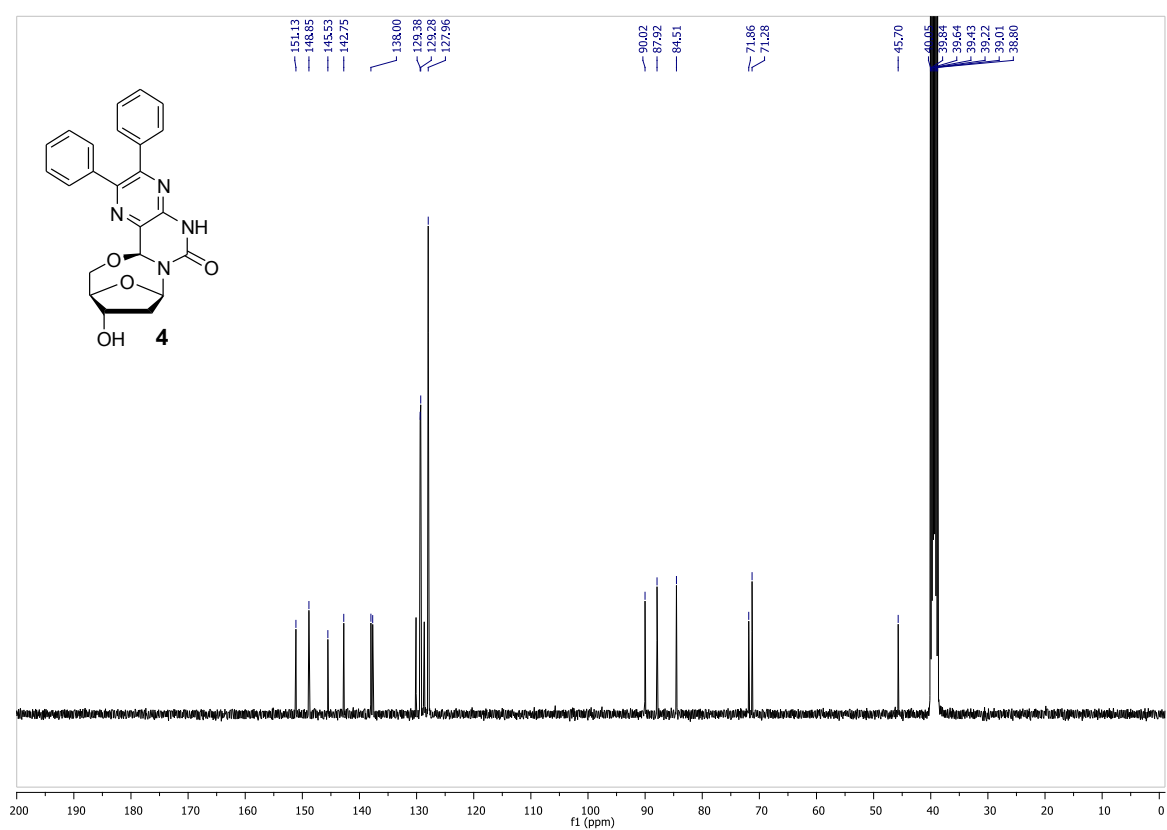



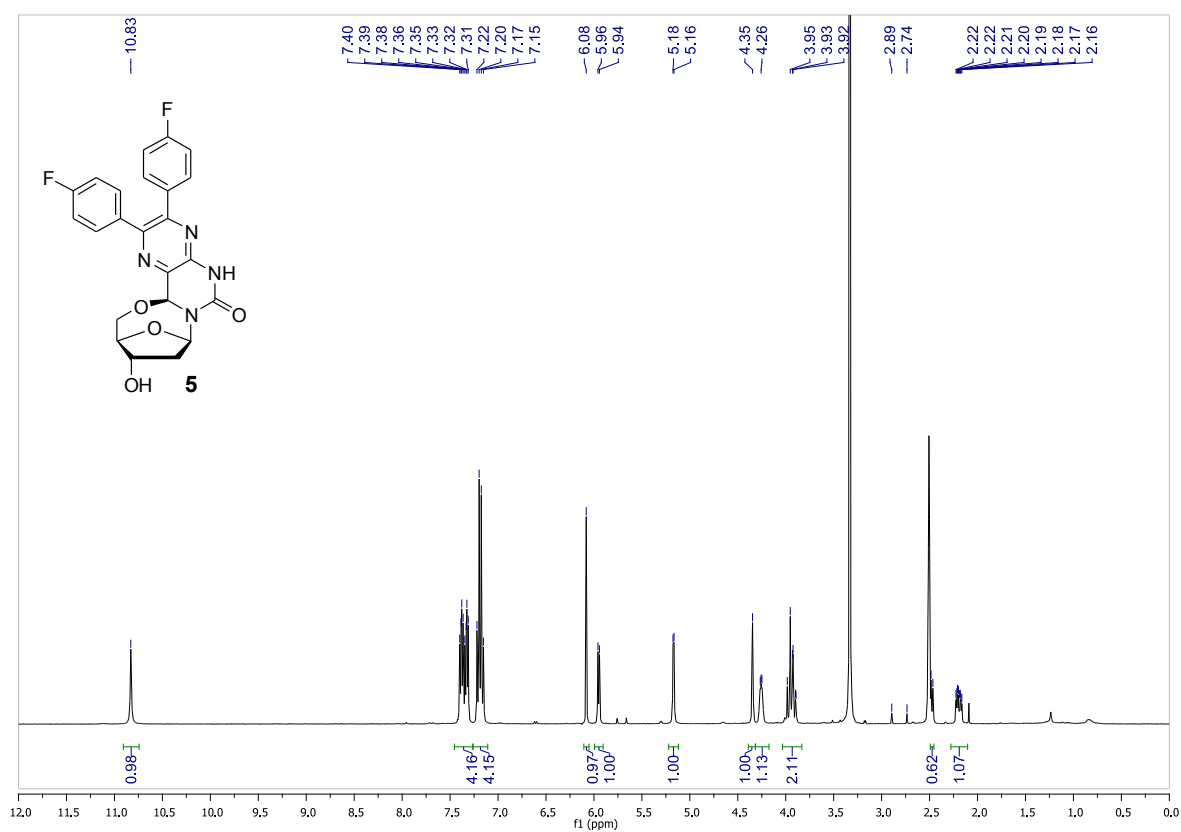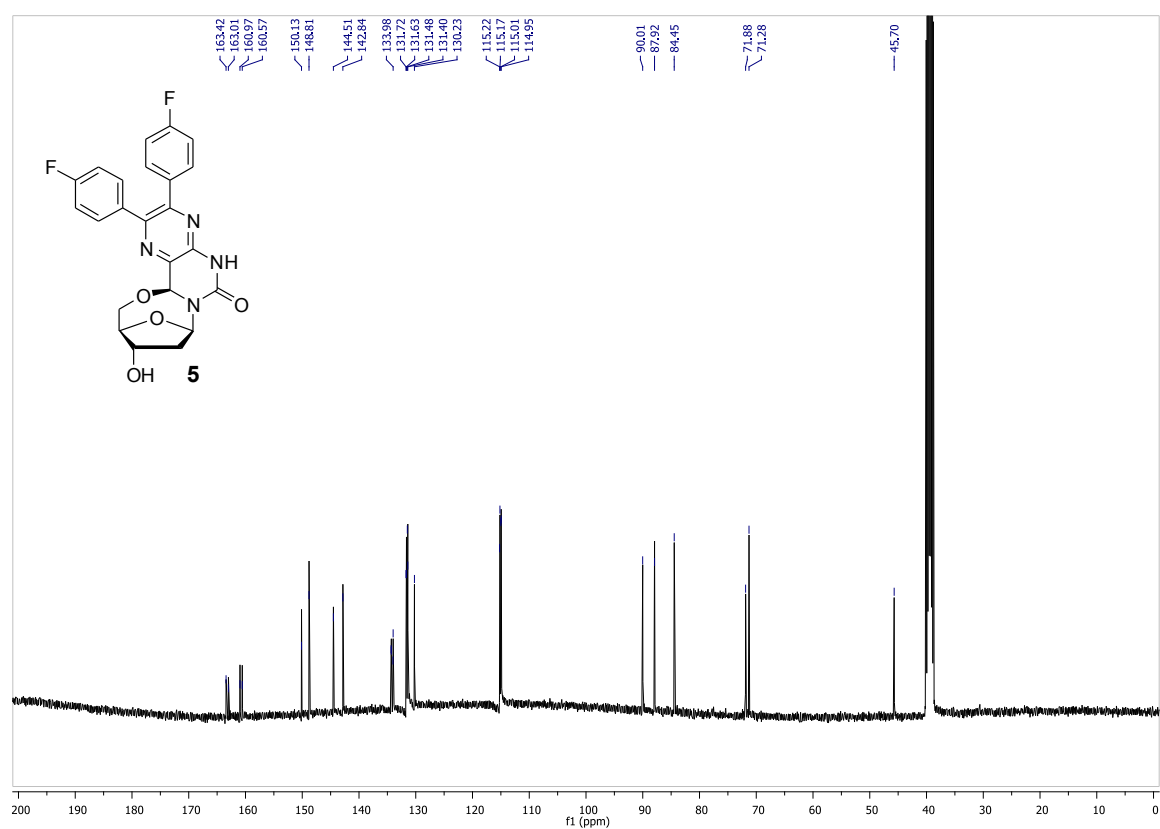

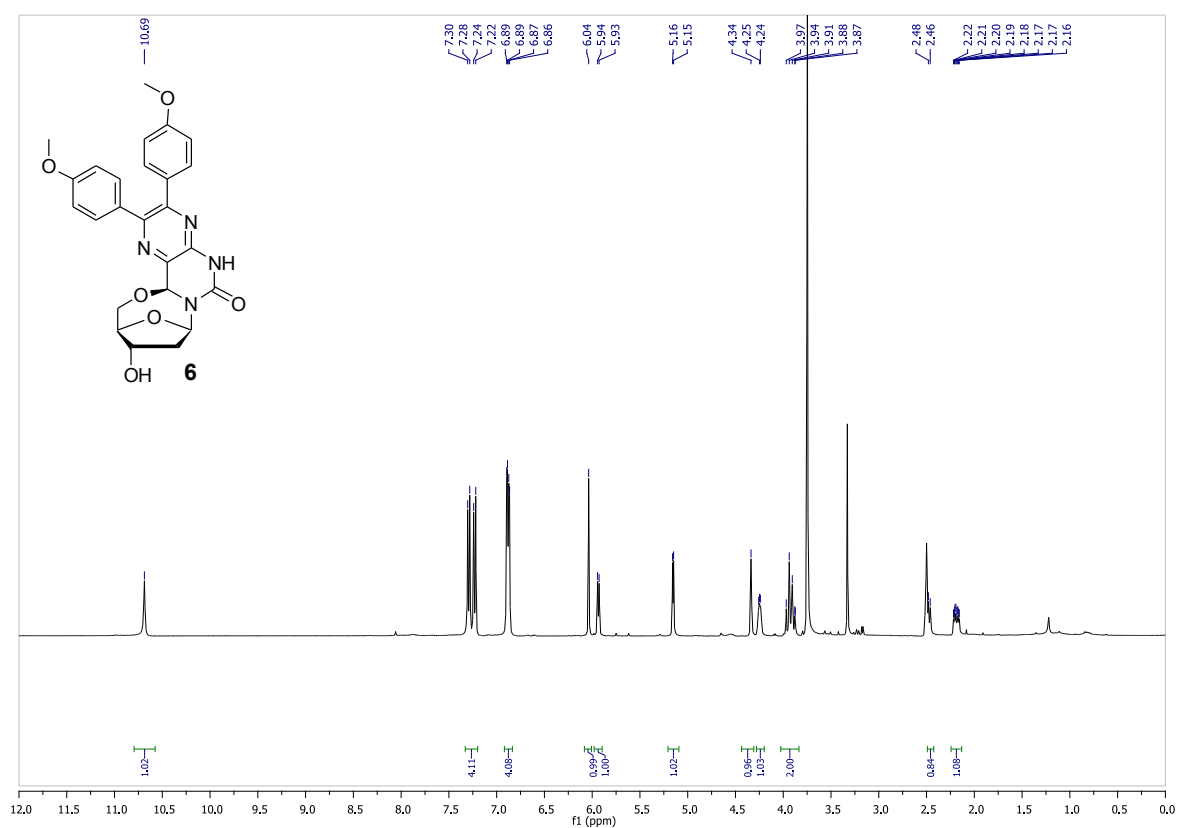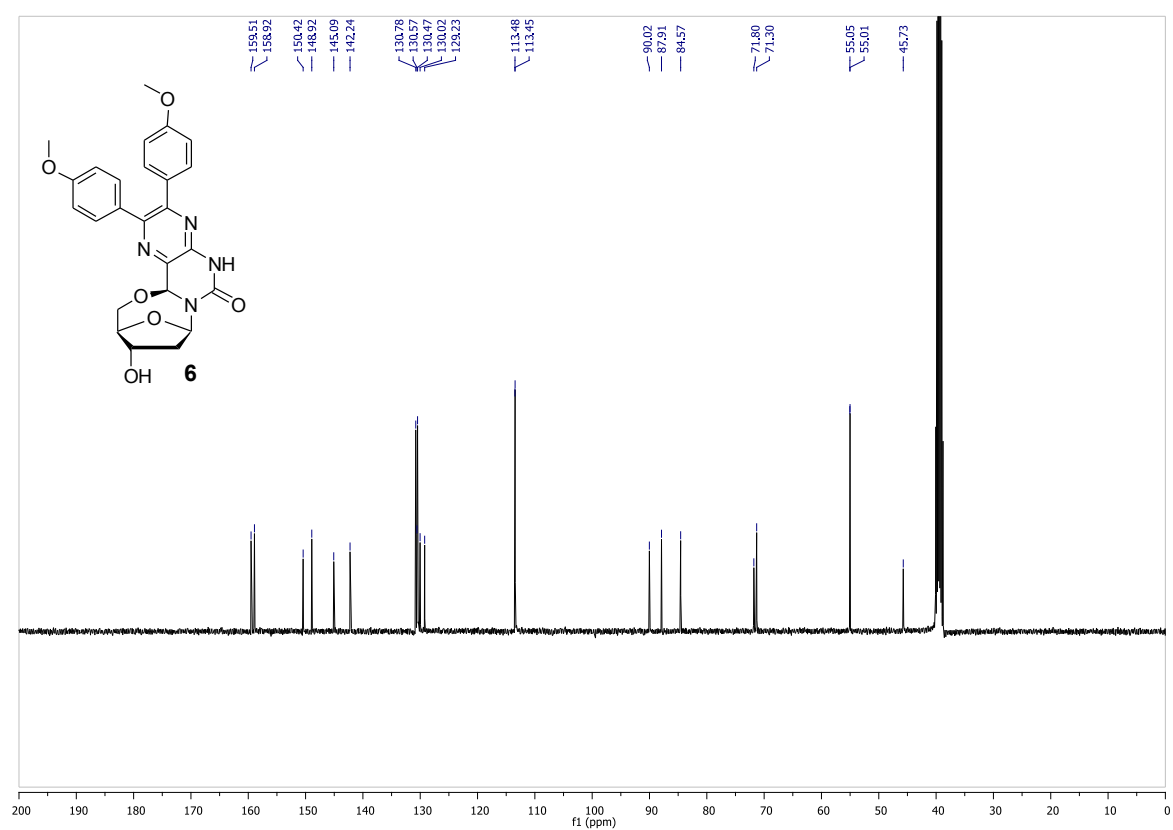

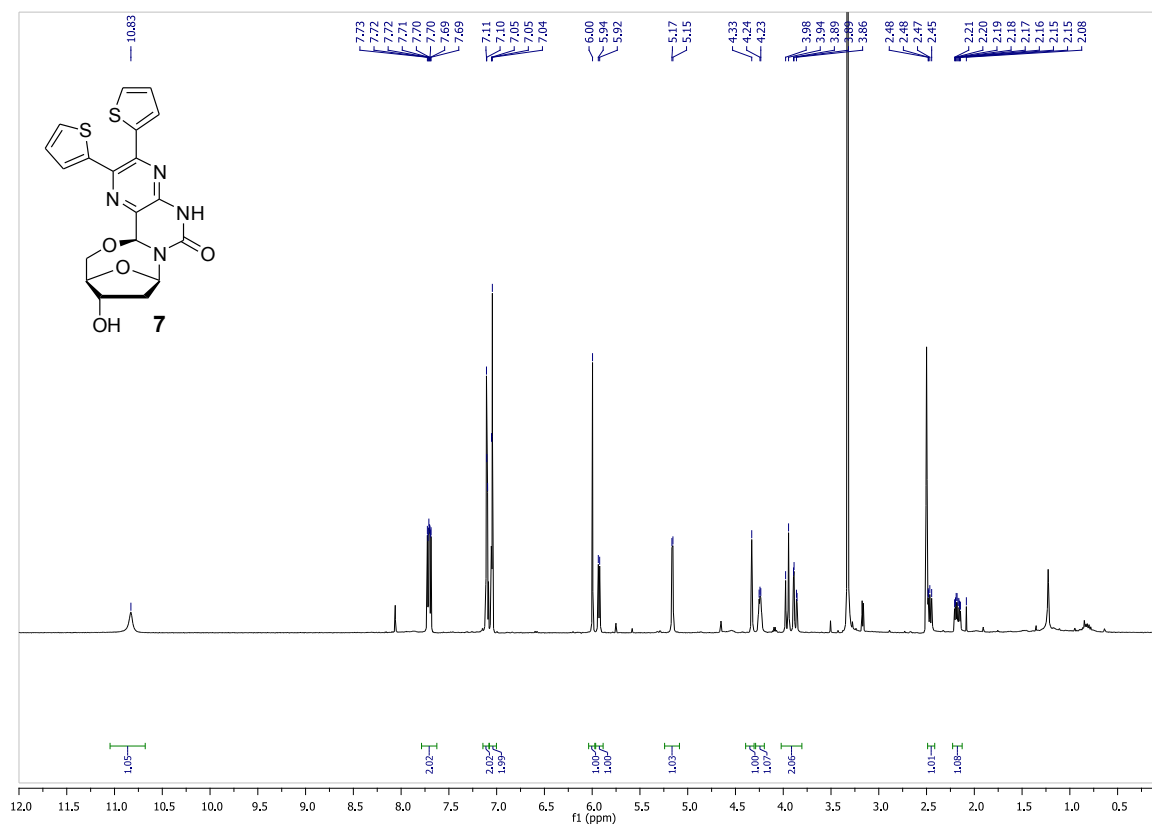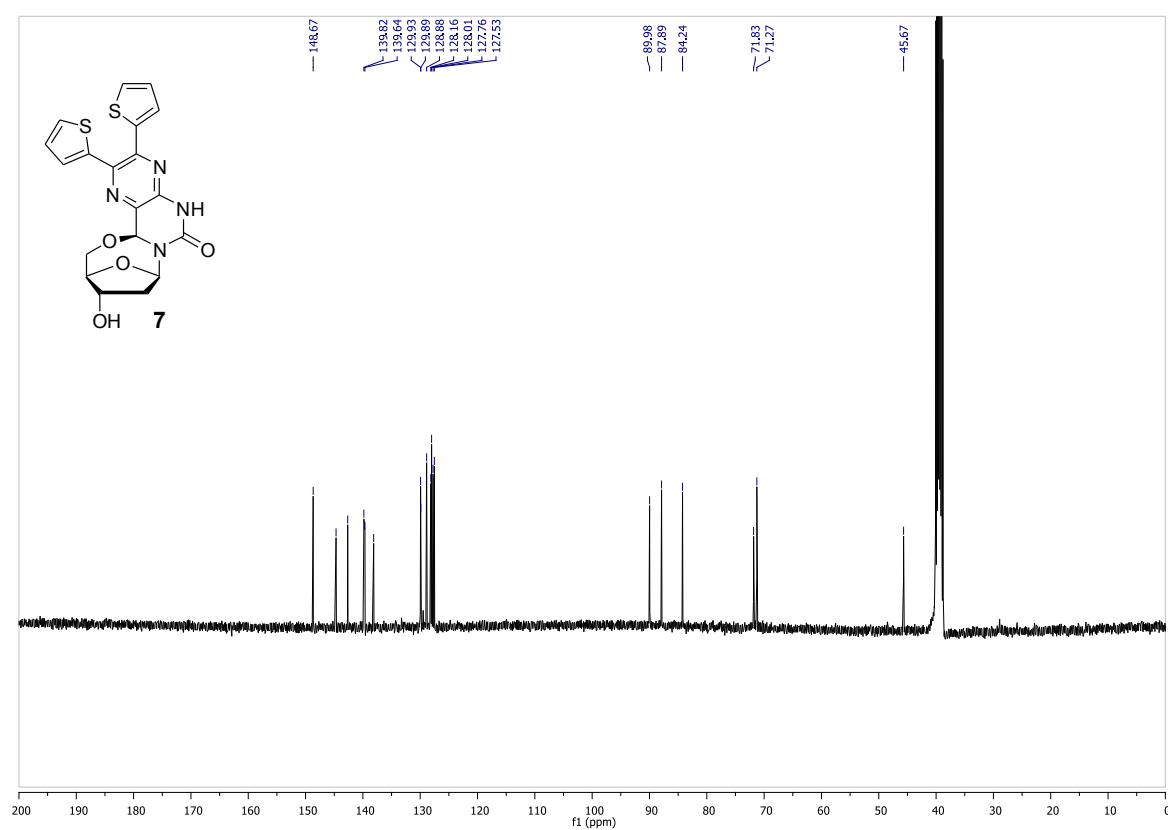

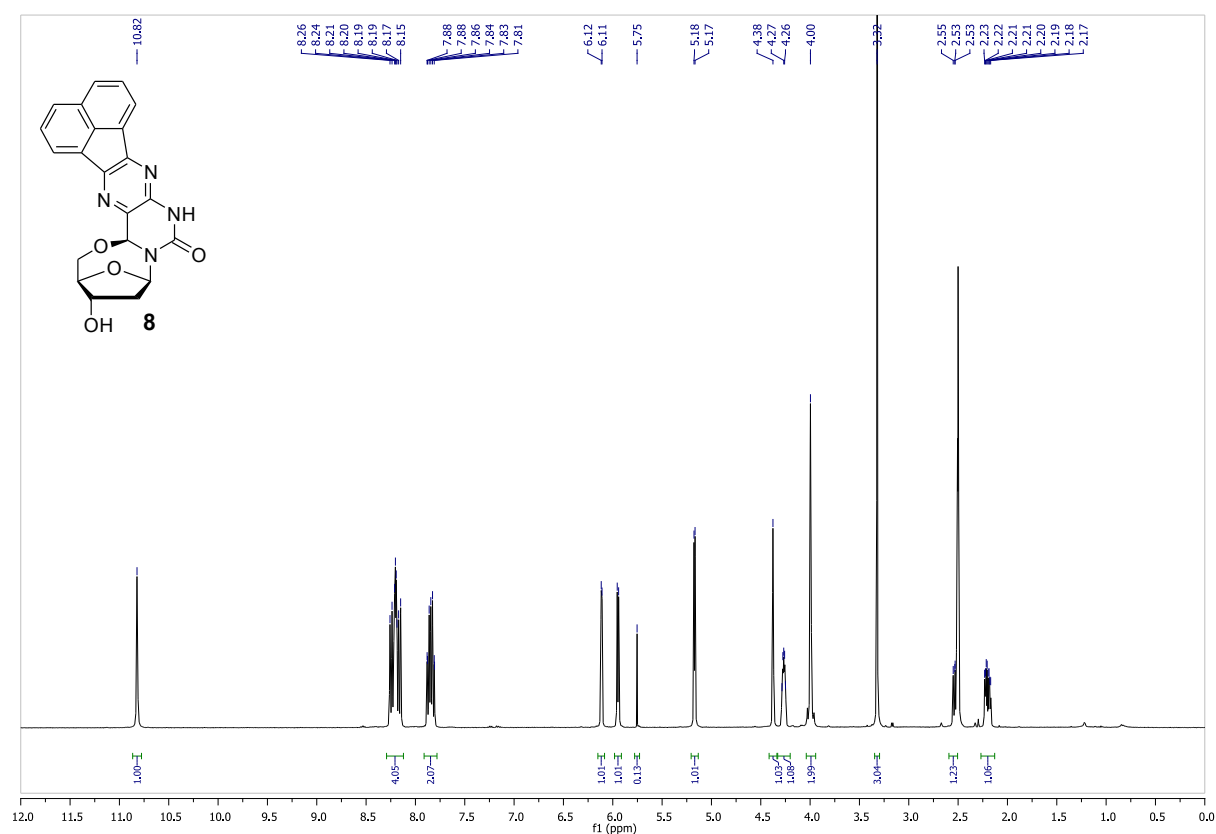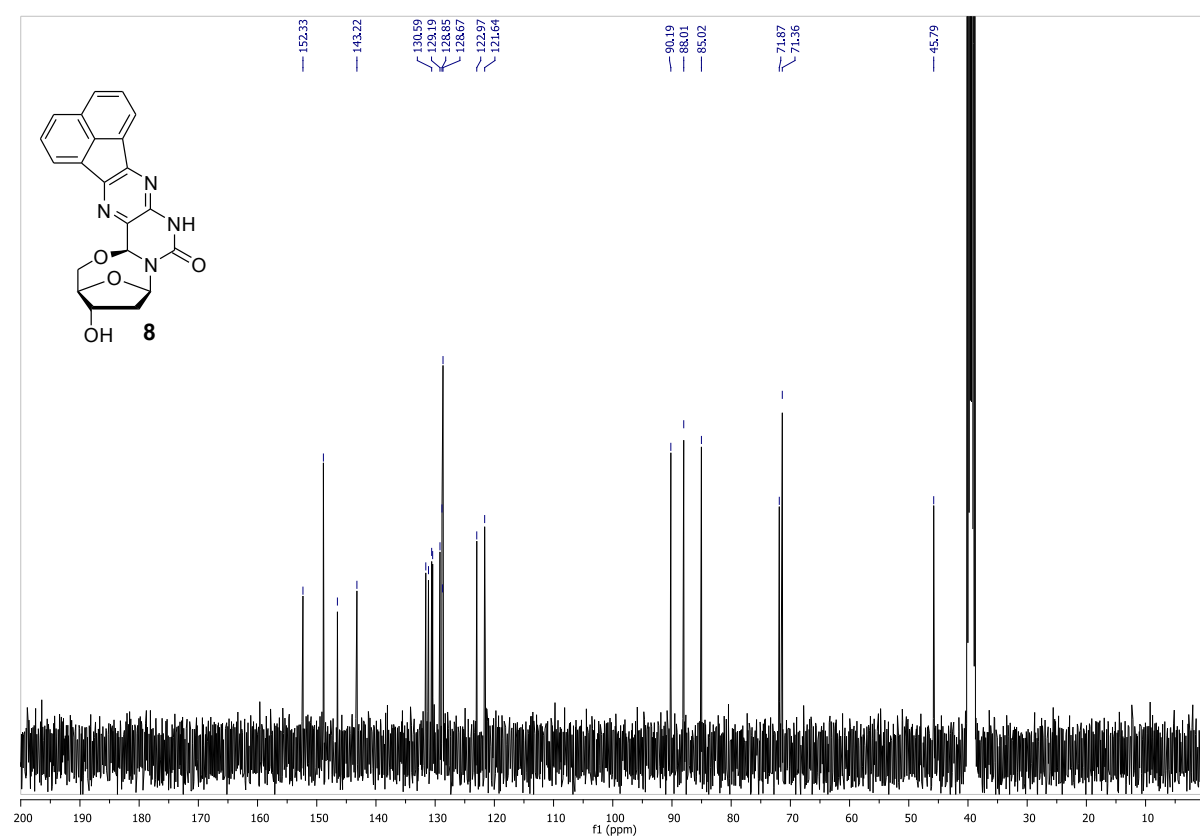

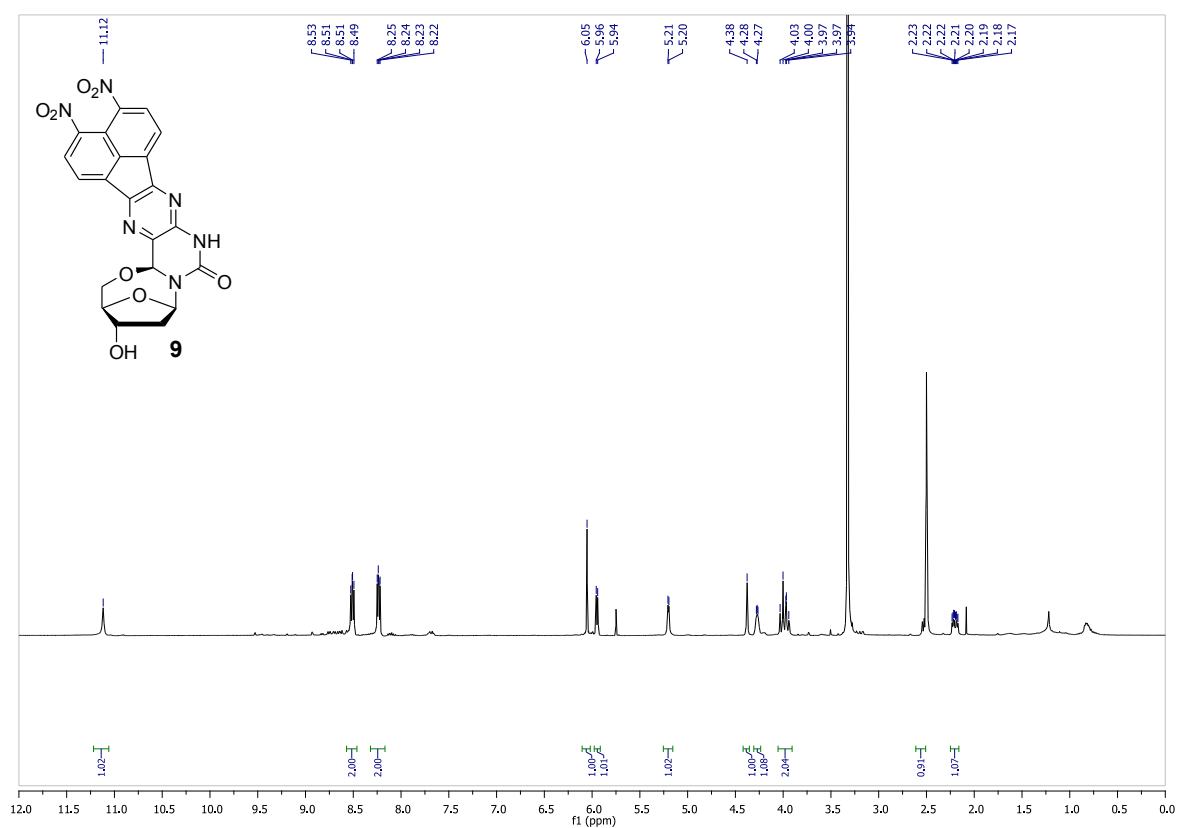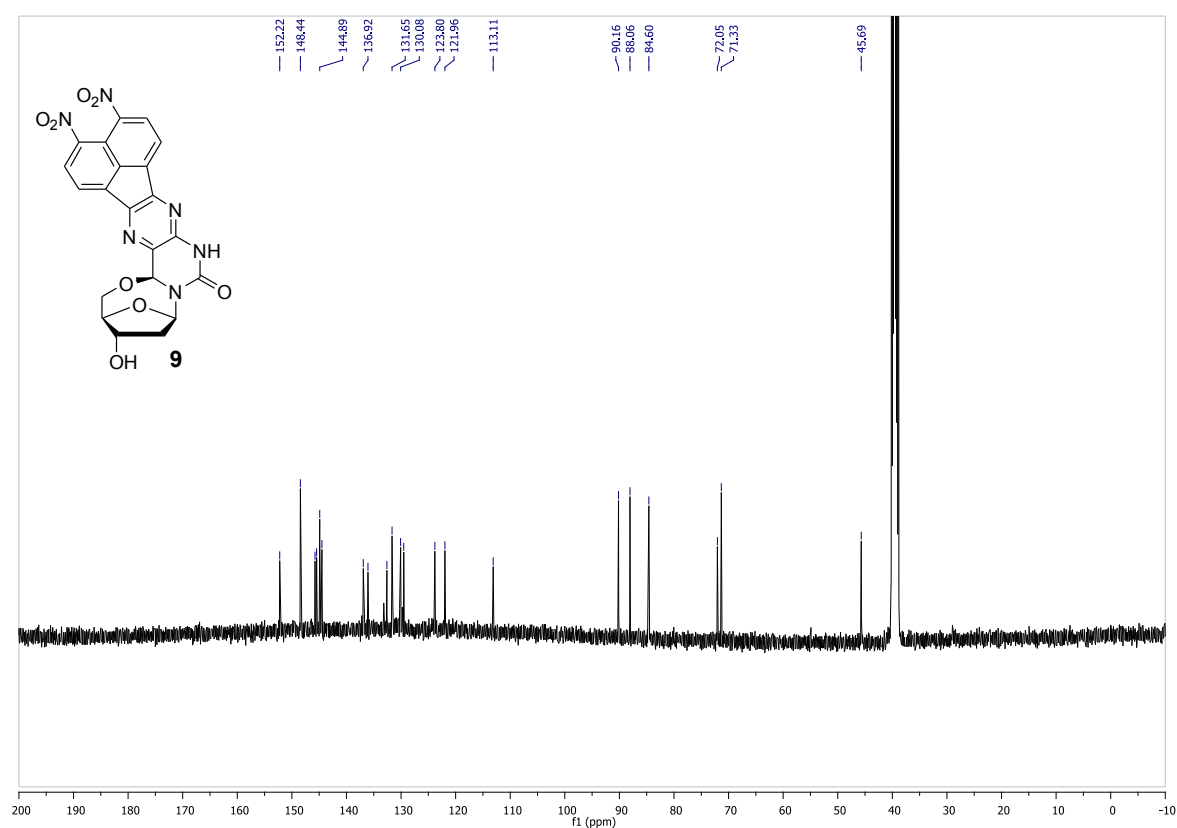

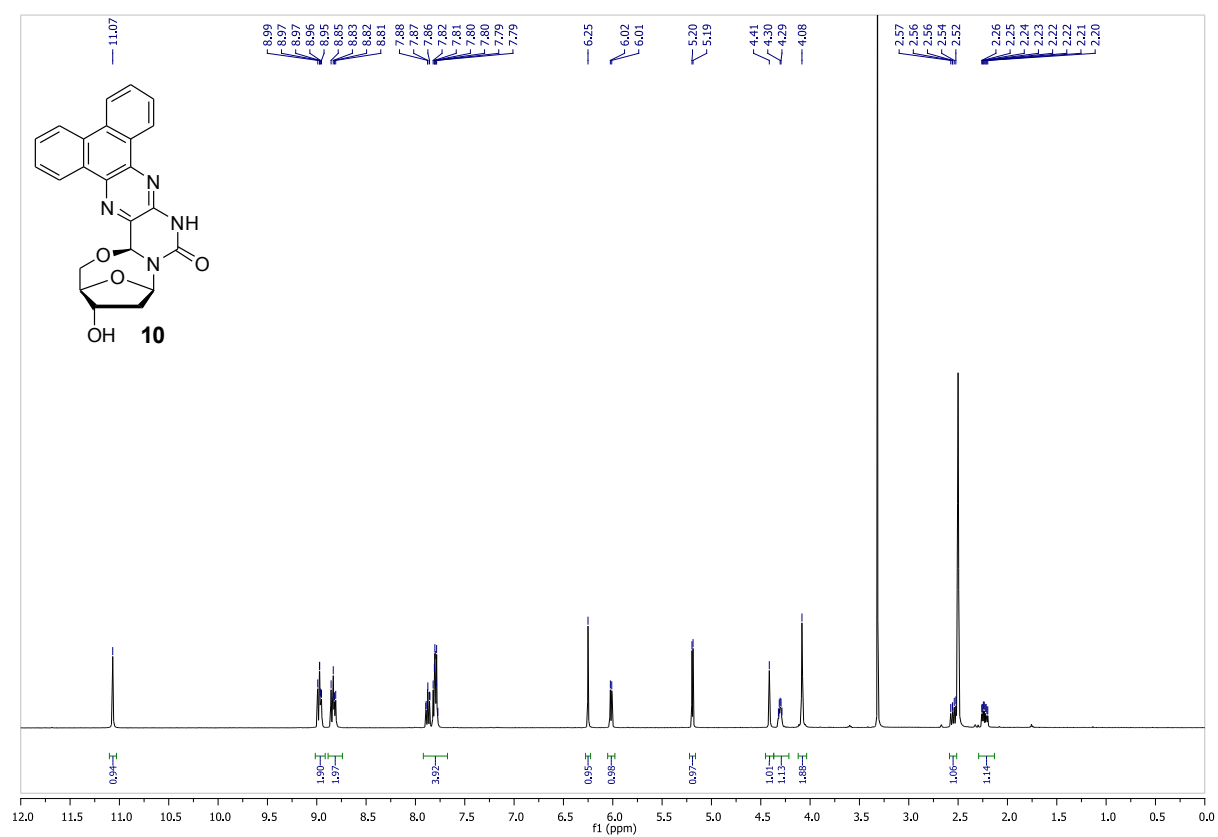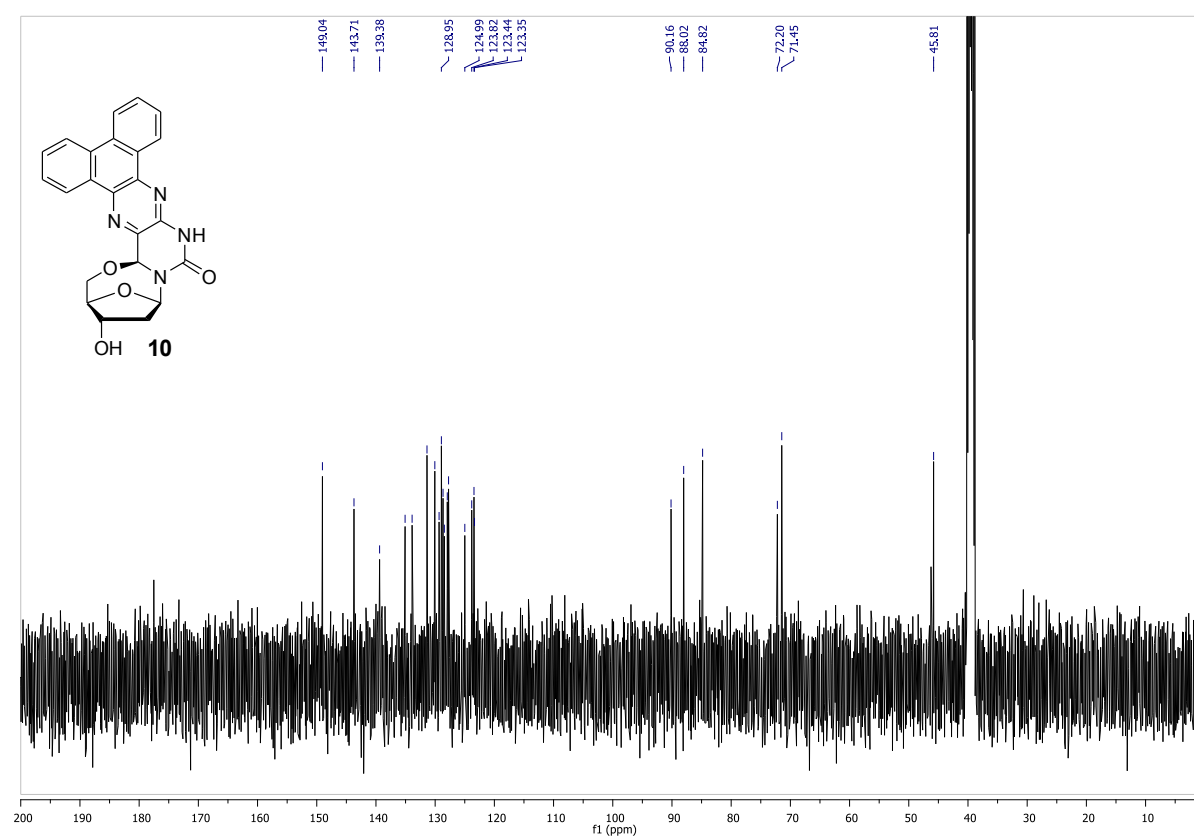

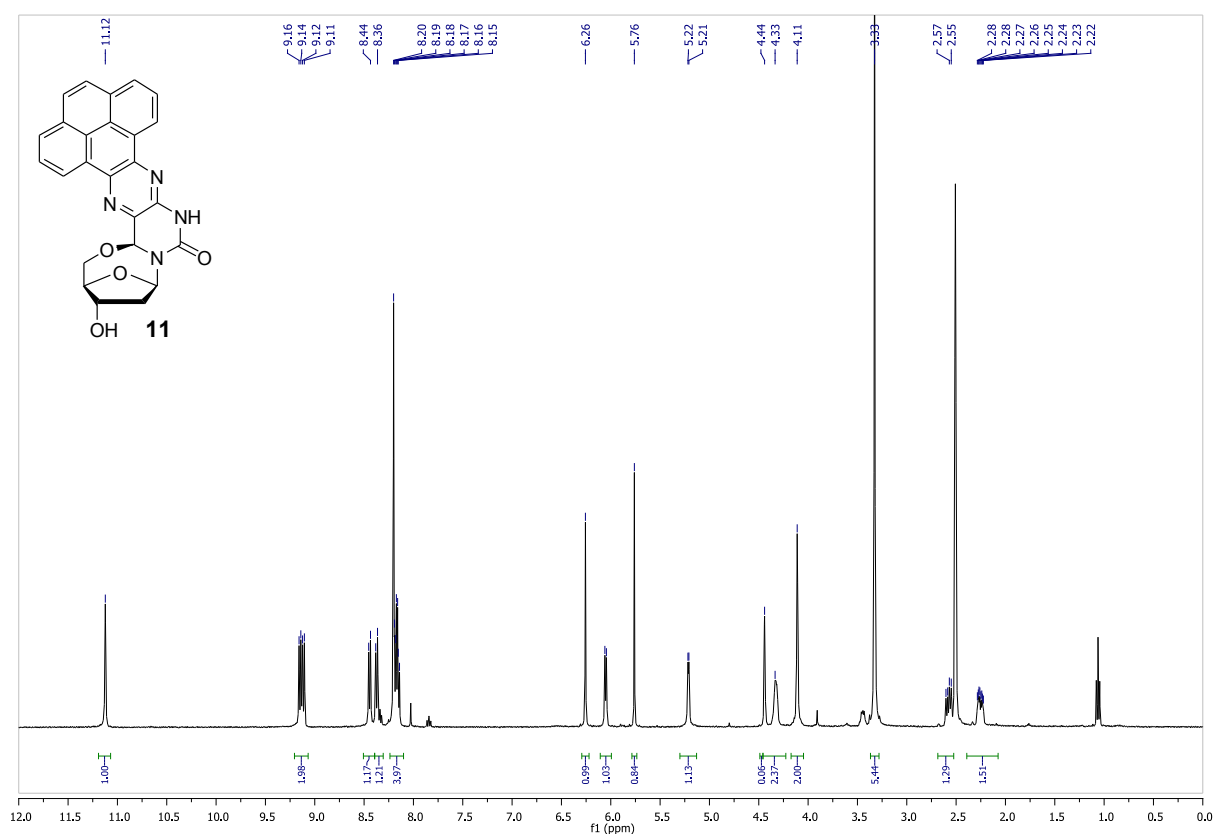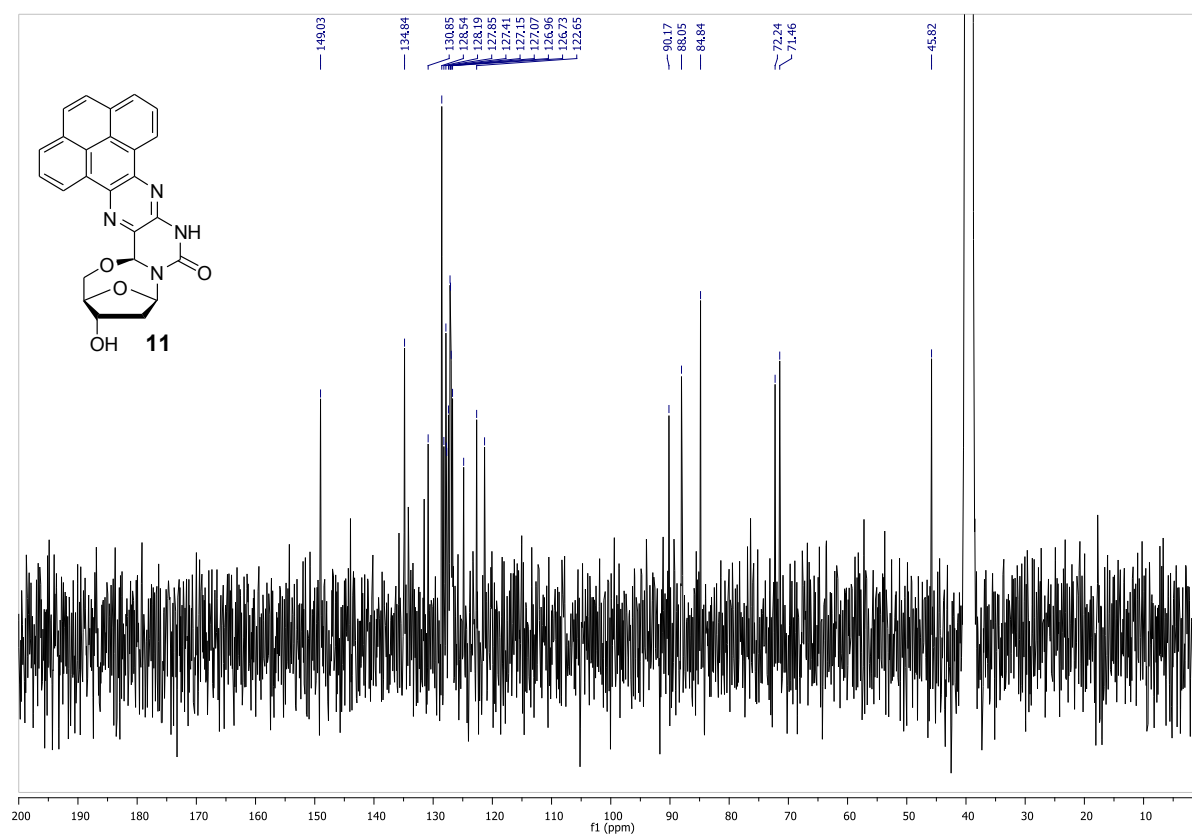

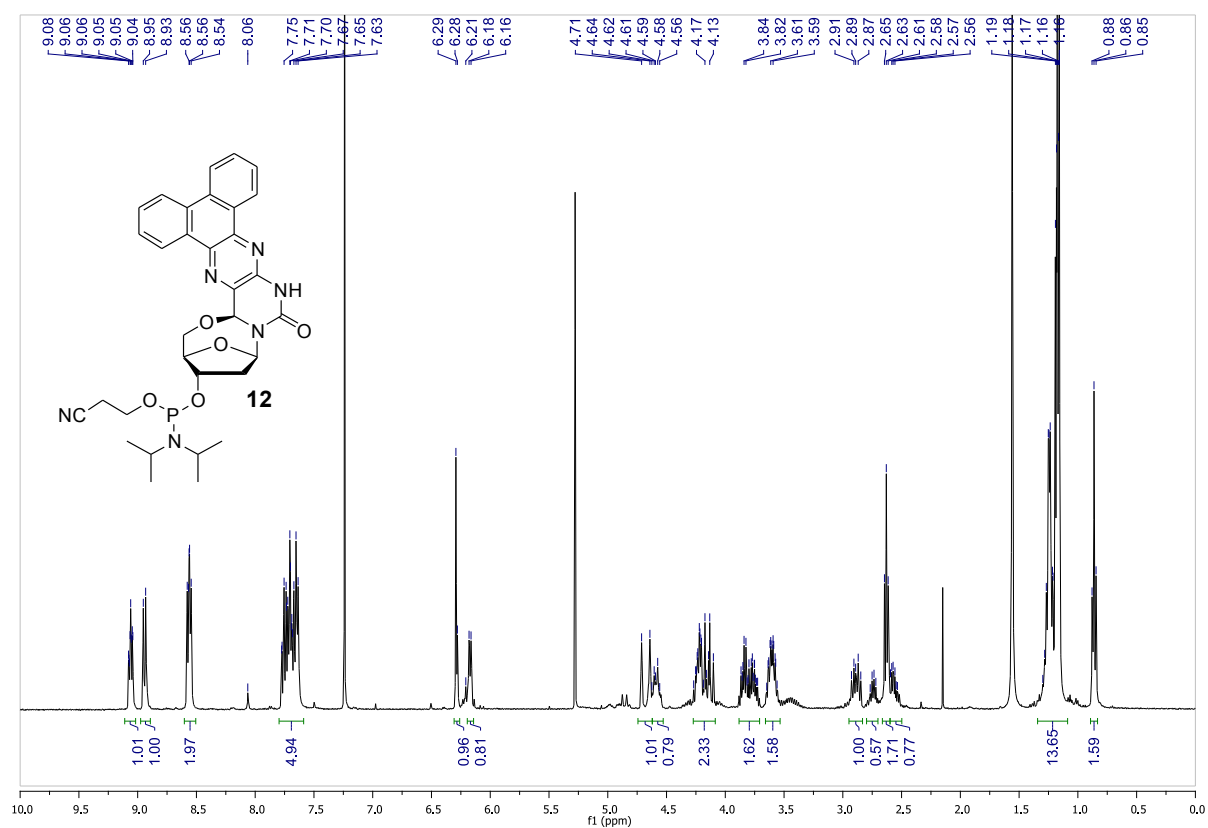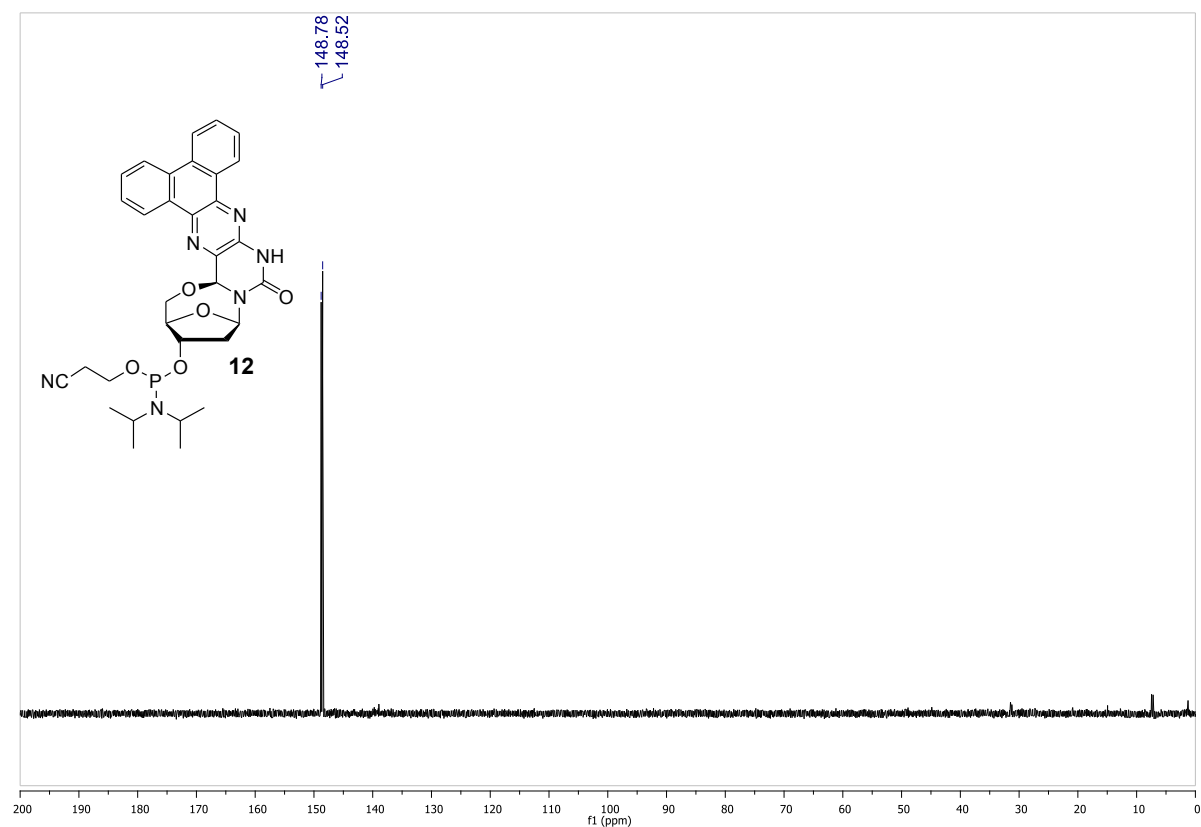

Supplement: c2ob26536b.pdf [file c2ob26536b.pdf]
